# Supplementary material
Source: PubMed Central journal article supplement (PMC5465752)
Supplement: brc-0012-0021-s01.pdf [file brc-0012-0021-s01.pdf]

# Therapeutic Advances and New Directions for Triple Negative Breast Cancer

Eleni Andreopoulou Catherine M. Kelly Hayley M. McDaid

## Supplementary Table 1. Summary of clinical and molecular characteristics of TNBC

### Clinical

- Accounts for about 15% of all breast cancers in U.S.
- More common in women of black race and/or Hispanic ethnicity
- Younger age at presentation
- Higher risk of visceral metastases, including predilection for brain metastasis and bone marrow involvement
- Associated with germ-line BRCA mutations in about 50% of patients with a strong family history of breast and/or ovarian cancer, and up to 20% of unselected patients

### Molecular

- Basal-like subtype and claudin-low subtypes are the most common “intrinsic subtypes” by gene expression
- When present, BRCA mutations are associated with defective DNA repair and sensitivity to DNA damaging agents and PARP inhibitors
- Sporadic cancers not associated with BRCA mutations are often BRCA-like due to methylation-induced silencing of BRCA1 and/or loss of other DNA repair proteins
- Commonly associated with somatic p53 mutations, but “clinically actionable” aberrations occur in < 20% (*BRAF* V600E, high-level *EGFR* amplifications, and *ERBB2* and *ERBB3* mutations) and may not be driver aberrations
- PI3K pathway activation despite low PI3K mutation rate due to *PTEN* and *INPP4B* loss and/or amplification of *PIK3CA*
- PD-L1 gene is expressed in about 20%-30% newly diagnosed early stage breast cancer, primarily in TNBC

**Supplementary Table 2. Novel agents in clinical development for treatment of TNBC**

| Therapeutic Target              | Agents                                                          | Phase of Study |
|---------------------------------|-----------------------------------------------------------------|----------------|
| <b>DNA Repair Pathway: PARP</b> | ABT-888 (veliparib), AZD2281 (olaparib),<br>BMN763              | I/II/III       |
| <b>EGFR</b>                     | erlotinib, cetuximab, panitumumab                               | II             |
| <b>Angiogenesis</b>             | Bevacizumab                                                     | III            |
|                                 | sunitinib, pazopanib                                            | II             |
| <b>HDAC</b>                     | vorinostat, entinostat                                          | II             |
| <b>Hsp90</b>                    | Ganetespib                                                      | II             |
| <b>AR</b>                       | bicalutamide, enzalutamide                                      | II             |
| <b>PI3K/AKT/mTOR</b>            | GDC-0941                                                        | II             |
|                                 | ipatasertib (GDC-0068), GSK2141795,<br>everolimus, temsirolimus |                |
| <b>MEK</b>                      | trametinib (GSK1120212)                                         | presurgical/II |
| <b>Src</b>                      | Dasatinib                                                       | II             |
| <b>Stem Cell Pathways:</b>      |                                                                 |                |
| <b>Notch</b>                    | R04929097, MK-0752                                              | I              |
| <b>Wnt</b>                      | LGK974                                                          | I              |
| <b>CXCR1/2</b>                  | Reparixin                                                       | presurgical/Ib |
| <b>CDKs</b>                     | P276-00, dinaciclib                                             | I/II           |
| <b>c-Met</b>                    | onartuzumab, ARQ197, foretinib                                  | II             |
| <b>Aurora kinase</b>            | ENMD-2076                                                       | II             |
| <b>DNA Repair pathway:</b>      | PF-00477736, CHIR-124                                           | Preclinical    |
| <b>Checkpoint kinase 1</b>      | SAR-020106, AZD7762                                             |                |
| <b>Death receptors</b>          | piperine                                                        | Preclinical    |
|                                 | tigatuzumab                                                     | II             |
| <b>Inhibitors of apoptosis</b>  | YM155                                                           | I              |
| <b>Immune</b>                   | LCL161                                                          | II             |
|                                 | MUC-1 vaccine, DC-CIK                                           | 0/I            |
| <b>CSF1 receptor, c-kit</b>     | Pembrolizumab, atelolizumab<br>PLX 3397                         | I/II<br>Ib/II  |

| Therapeutic Target | Agents                          | Phase of Study |
|--------------------|---------------------------------|----------------|
| Targeted Cytotoxic | glembatumumab vedotin (CDX-011) | II             |
| Anti-Trop-2-SN-38  | Sacituzumab govitecan/ IMMU-132 | I/II           |

Abbreviations: EGFR epidermal growth factor receptor; AR androgen receptor; mTOR mammalian target of rapamycin; CDK cyclin dependent kinase; PARP poly ADP ribose polymerase; MEK mitogen-activated protein/extracellular signal regulated kinase; Src sarcoma; DC-CIK Dendritic cell - cytokine-induced killer cell; CSF1 colony stimulating factor 1

**Supplementary Table 3. Revised Molecular Subtype of TNBC (TNBCtype-4)**

| TNBCtype-4 Designation | “Driver” pathway(s) inferred by Gene Ontology                  | Estimated Prevalence in TNBC (%)¶ | % Patients Achieving pCR§ | Putative Therapeutic Intervention                                         |
|------------------------|----------------------------------------------------------------|-----------------------------------|---------------------------|---------------------------------------------------------------------------|
| BL1                    | cell cycle, DNA damage response                                | 35                                | 46                        | platinum agents, PARP inhibitors (veliparib, olaparib)                    |
| BL2                    | cell cycle, DNA damage response, growth factor signaling       | 22                                | 12                        |                                                                           |
| M                      | cell motility, ECM receptor interactions, cell differentiation | 25                                | 29                        | Abl/Src inhibitor (dasatinib), PI3K/mTOR inhibitor (NVP-BEZ235)           |
| LAR                    | steroid synthesis and metabolism                               | 16                                | 15                        | bicalutamide, Hsp90 inhibitor (17-DMAG), PI3K/mTOR inhibitor (NVP-BEZ235) |

¶ 2% assigned to 'unclassified' molecular subtype.

§ Response to neoadjuvant ACT

**Supplementary Table 4. Platinum Trials in the Neoadjuvant Setting in TNBC and BRCA-Associated Breast Cancer**

| Phase               | N   | BRCA status | Regimen                                                                                   | pCR Rate                                   | 3y - EFS                        | Reference                                              |
|---------------------|-----|-------------|-------------------------------------------------------------------------------------------|--------------------------------------------|---------------------------------|--------------------------------------------------------|
| II                  | 28  | unselected  | cisplatin                                                                                 | 21%                                        |                                 | Silver et al., JCO, 2010                               |
| II                  | 25  | mutant      | cisplatin                                                                                 | 72%                                        |                                 | Gronwald et al., JCO, 2009                             |
| randomized phase II | 454 | unselected  | weekly paclitaxel, dose-dense AC, +bevacizumab, +carboplatin, or +carboplatin/bevacizumab | 60% (+ carboplatin)<br>46% (- carboplatin) | HR 0.84 (0.58-1.22)<br>P=0.36   | Sikov et al., SABCC, 2013 & 2015                       |
| randomized phase II | 315 | unselected  | anthracycline/taxane ± carboplatin                                                        | 59% (+ carboplatin)<br>38% (- carboplatin) | HR 0.56 (0.33-0.96)<br>p=0.0350 | Von Minckwitz et al., Lancet Oncol. 2014 & SABCC, 2015 |

**Supplementary Table 5. Selected active clinical trials for TNBC or BRCA-associated breast cancer**

| Clinical Trial Title                                                                                                                                                                                                                                        | Phase | Cancer.gov  |
|-------------------------------------------------------------------------------------------------------------------------------------------------------------------------------------------------------------------------------------------------------------|-------|-------------|
| <b>Platinum containing regimens</b>                                                                                                                                                                                                                         |       |             |
| A randomized phase III postoperative trial of cisplatin vs capecitabine vs observation in patients with residual basal like triple negative breast cancer following neoadjuvant chemotherapy. (E1113)                                                       | III   | NCT02445391 |
| <b>PARP inhibitors</b>                                                                                                                                                                                                                                      |       |             |
| Olaparib as Adjuvant Treatment in Patients With Germline BRCA Mutated High Risk HER2 Negative Primary Breast Cancer (OlympiA)                                                                                                                               | III   | NCT02032823 |
| A Study Evaluating Safety and Efficacy of the Addition of ABT-888 Plus Carboplatin Versus the Addition of Carboplatin to Standard Chemotherapy Versus Standard Chemotherapy in Subjects With Early Stage Triple Negative Breast Cancer (Brightness)         | III   | NCT02032277 |
| A Pilot Study of Talazoparib as a Neoadjuvant Study in Patients With a Diagnosis of Invasive Breast Cancer and a Deleterious BRCA Mutation                                                                                                                  | II    | NCT02282345 |
| Phase II Randomized Placebo-Controlled Trial of Cisplatin With or Without ABT-888 (Veliparib) in Metastatic Triple-Negative Breast Cancer and/or BRCA Mutation-Associated Breast Cancer                                                                     | II    | NCT02595905 |
| Phase I Study of the Oral PI3kinase Inhibitor BKM120 or BYL719 and the Oral PARP Inhibitor Olaparib in Patients With Recurrent Triple Negative Breast Cancer or High Grade Serous Ovarian Cancer                                                            | I     | NCT01623349 |
| A Phase III, Randomized, Open Label, Multicenter, Controlled Trial of Niraparib Versus Physician's Choice in Previously-treated, HER2 Negative, Germline BRCA Mutation-positive Breast Cancer Patients                                                      | III   | NCT01905592 |
| A Phase II Multiple-Arm, Open-Label, Randomized Study of PARP Inhibition (Veliparib; ABT-888) and Anti-PD-L1 Therapy (Atezolizumab; MPDL3280A) Either Alone or in Combination in Homologous DNA Repair (HDR) Deficient Triple Negative Breast Cancer (TNBC) | II    | NCT02849496 |
| Phase 1/2 Clinical Study of Niraparib in Combination With Pembrolizumab in Patients With Advanced or Metastatic Triple-Negative Breast Cancer and in Patients With Recurrent Ovarian Cancer                                                                 | I/II  | NCT02657889 |
| Phase I/II Study of the Anti-Programmed Death Ligand-1 Antibody MEDI4736 in Combination With Olaparib or Cediranib for Advanced Solid Tumors and Advanced or Recurrent Ovarian, Triple Negative Breast, Lung, Prostate and Colorectal Cancer                | I/II  | NCT02484404 |
| Phase II Study of Rucaparib plus cisplatin in BRCA1/2 mutant TNBC                                                                                                                                                                                           | II    | NCT01074970 |
| <b>PI3K/AKT/mTOR inhibitors</b>                                                                                                                                                                                                                             |       |             |
| Trametinib and Akt Inhibitor GSK2141795 in Treating Patients With Metastatic Triple-Negative Breast Cancer                                                                                                                                                  | II    | NCT01964924 |
| PIPA: A Phase Ib Study to Assess the Safety, Tolerability and Efficacy of the PI3K Inhibitors, Taselisib (GDC-0032) or Pictilisib (GDC-0941), in Combination With Palbociclib, With the Subsequent Addition of Fulvestrant in PIK3CA-mutant Breast Cancers  | I     | NCT02389842 |
| <b>Other targeted agents</b>                                                                                                                                                                                                                                |       |             |
| Study of Glembatumumab Vedotin (CDX-011) in Patients With Metastatic, gpNMB Over-Expressing, Triple Negative Breast Cancer (METRIC)                                                                                                                         | II    | NCT01997333 |

| Clinical Trial Title                                                                                                                                                                                                                                             | Phase | Cancer.gov  |
|------------------------------------------------------------------------------------------------------------------------------------------------------------------------------------------------------------------------------------------------------------------|-------|-------------|
| Safety and Efficacy Study of Enzalutamide in Patients With Advanced, Androgen Receptor-Positive, Triple Negative Breast Cancer                                                                                                                                   | II    | NCT01889238 |
| <b>Immunotherapy</b>                                                                                                                                                                                                                                             |       |             |
| Targeted T Cells After Neoadjuvant Chemotherapy in Treating Women With Stage II or Stage III Breast Cancer Undergoing Surgery                                                                                                                                    | II    | NCT01147016 |
| A Randomized Open-Label Phase III Study of Single Agent Pembrolizumab Versus Single Agent Chemotherapy Per Physician's Choice for Metastatic Triple Negative Breast Cancer (mTNBC) - (KEYNOTE-119)                                                               | III   | NCT02555657 |
| A Phase II Clinical Trial of Pembrolizumab (MK-3475) as Monotherapy for Metastatic Triple-Negative Breast Cancer (mTNBC) - (KEYNOTE-086)                                                                                                                         | II    | NCT02447003 |
| Phase 1/2a Study of Double-Immune Suppression Blockade By Combining a CSF1R Inhibitor (PLX3397) With An Anti-PD-1 Antibody (Pembrolizumab) To Treat Advanced Melanoma And Other Solid Tumors                                                                     | I/IIA | NCT02452424 |
| This Phase 1/2 study will evaluate the safety and efficacy of combination treatment with niraparib and pembrolizumab (MK-3475) in patients with advanced or metastatic triple-negative breast cancer or recurrent ovarian cancer. (KEYNOTE-162)                  | I/II  | NCT02657889 |
| Adaptive Phase II Randomized Non-comparative Trial of Nivolumab After Induction Treatment in Triple-negative Breast Cancer (TNBC) Patients: TONIC-trial                                                                                                          | II    | NCT02499367 |
| A Phase 1 Study Evaluating Safety, Tolerability, and Preliminary Antitumor Activity of Entinostat and Nivolumab With or Without Ipilimumab in Advanced Solid Tumors                                                                                              | I     | NCT02453620 |
| A Phase 1, Open-Label, Dose Escalation Study of MGA271 in Combination With Ipilimumab in Patients With B7-H3-Expressing Melanoma, Squamous Cell Cancer of the Head and Neck, Non Small Cell Lung Cancer, and Other B7H3 Expressing Cancers                       | I     | NCT02381314 |
| A Phase II, Multi-Center, Open-Label Study of Tremelimumab Monotherapy in Patients With Advanced Solid Tumors                                                                                                                                                    | II    | NCT02527434 |
| A Phase III, Multicenter, Randomized Placebo-Controlled Study of Atezolizumab (Anti-PD-L1 Antibody) in Combination With Nab Paclitaxel Compared With Placebo With Nab Paclitaxel for Patients With Previously Untreated Metastatic Triple Negative Breast Cancer | III   | NCT02425891 |
| Open Label Multicenter Phase I/II Study of the Safety and Efficacy of PDR001 Administered to Patients With Advanced Malignancies                                                                                                                                 | I/II  | NCT02404441 |

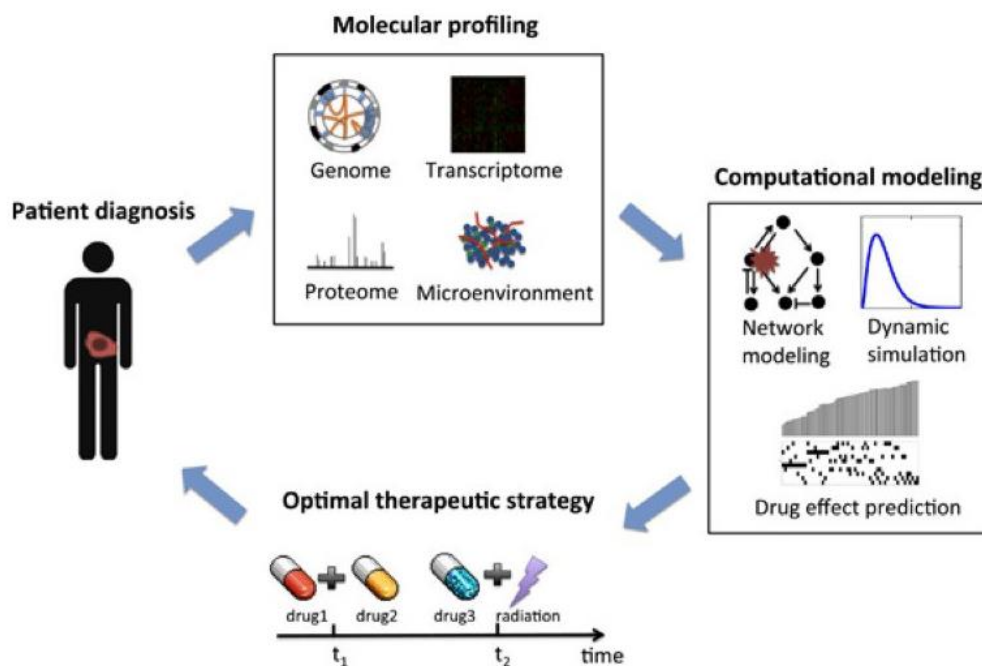

**Supplementary Figure 1.** Cancer Systems Biology: embracing complexity to develop better anticancer therapeutic strategies. (Du, W. and Elemento, O. 2015. *Oncogene* 34(25): 3215-25).  
*Courtesy - Olivier Elemento*

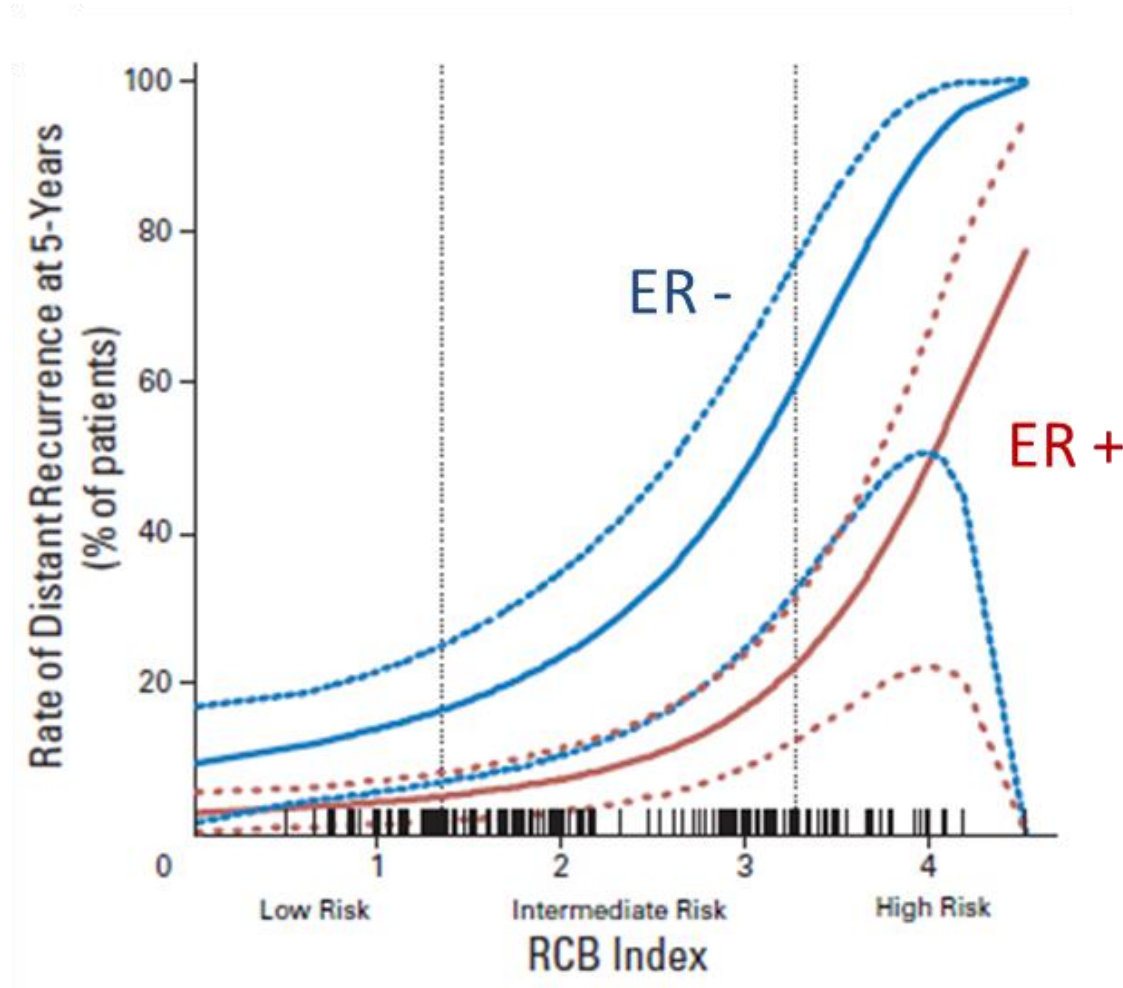

**Supplementary Figure 2.** Residual Cancer Burden (RCB) Index, a measure of the residual tumor burden after neoadjuvant chemotherapy, predicts risk of distant relapse at five years. For a given RCB score, ER- patients have a higher risk of developing distant metastases than ER+ patients. *Courtesy of W.F. Symmans*



## References

- 1 Bauer KR, Brown M, Cress RD, Parise CA, Caggiano V: Descriptive analysis of estrogen receptor (ER)-negative, progesterone receptor (PR)-negative, and HER2-negative invasive breast cancer, the so-called triple-negative phenotype: a population-based study from the California cancer Registry. *Cancer* 2007;109:1721-1728.
- 2 Hammond ME, Hayes DF, Dowsett M, Allred DC, Hagerty KL, Badve S, Fitzgibbons PL, Francis G, Goldstein NS, Hayes M, Hicks DG, Lester S, Love R, Mangu PB, McShane L, Miller K, Osborne CK, Paik S, Perlmutter J, Rhodes A, Sasano H, Schwartz JN, Sweep FC, Taube S, Torlakovic EE, Valenstein P, Viale G, Visscher D, Wheeler T, Williams RB, Wittliff JL, Wolff AC, American Society of Clinical O, College of American P: American Society of Clinical Oncology/College of American Pathologists guideline recommendations for immunohistochemical testing of estrogen and progesterone receptors in breast cancer (unabridged version). *Archives of pathology & laboratory medicine* 2010;134:e48-72.
- 3 Brown M, Tsodikov A, Bauer KR, Parise CA, Caggiano V: The role of human epidermal growth factor receptor 2 in the survival of women with estrogen and progesterone receptor-negative, invasive breast cancer: the California Cancer Registry, 1999-2004. *Cancer* 2008;112:737-747.
- 4 Nielsen TO, Hsu FD, Jensen K, Cheang M, Karaca G, Hu Z, Hernandez-Boussard T, Livasy C, Cowan D, Dressler L, Akslen LA, Ragaz J, Gown AM, Gilks CB, van de Rijn M, Perou CM: Immunohistochemical and clinical characterization of the basal-like subtype of invasive breast carcinoma. *Clinical cancer research : an official journal of the American Association for Cancer Research* 2004;10:5367-5374.
- 5 Perou CM, Sorlie T, Eisen MB, van de Rijn M, Jeffrey SS, Rees CA, Pollack JR, Ross DT, Johnsen H, Akslen LA, Fluge O, Pergamenschikov A, Williams C, Zhu SX, Lonning PE, Borresen-Dale AL, Brown PO, Botstein D: Molecular portraits of human breast tumours. *Nature* 2000;406:747-752.
- 6 Deng L, Liang H, Burnette B, Beckett M, Darga T, Weichselbaum RR, Fu Y-X: Irradiation and anti-PD-L1 treatment synergistically promote antitumor immunity in mice. *The Journal of clinical investigation* 2014;124:687-695.
- 7 Liedtke C, Mazouni C, Hess KR, Andre F, Tordai A, Mejia JA, Symmans WF, Gonzalez-Angulo AM, Hennessy B, Green M, Cristofanilli M, Hortobagyi GN, Pusztai L: Response to neoadjuvant therapy and long-term survival in patients with triple-negative breast cancer. *Journal of clinical oncology : official journal of the American Society of Clinical Oncology* 2008;26:1275-1281.
- 8 Smid M, Wang Y, Zhang Y, Sieuwerts AM, Yu J, Klijn JG, Foekens JA, Martens JW: Subtypes of breast cancer show preferential site of relapse. *Cancer research* 2008;68:3108-3114.
- 9 Lakhani SR, Van De Vijver MJ, Jacquemier J, Anderson TJ, Osin PP, McGuffog L, Easton DF: The pathology of familial breast cancer: predictive value of immunohistochemical markers estrogen receptor, progesterone receptor, HER-2, and p53 in patients with mutations in BRCA1

and BRCA2. *Journal of clinical oncology : official journal of the American Society of Clinical Oncology* 2002;20:2310-2318.

10 Turner N, Tutt A, Ashworth A: Hallmarks of 'BRCAness' in sporadic cancers. *Nature reviews Cancer* 2004;4:814-819.

11 Turner NC, Reis-Filho JS, Russell AM, Springall RJ, Ryder K, Steele D, Savage K, Gillett CE, Schmitt FC, Ashworth A, Tutt AN: BRCA1 dysfunction in sporadic basal-like breast cancer. *Oncogene* 2007;26:2126-2132.

12 Lehmann BD, Bauer JA, Chen X, Sanders ME, Chakravarthy AB, Shyr Y, Pietenpol JA: Identification of human triple-negative breast cancer subtypes and preclinical models for selection of targeted therapies. *The Journal of clinical investigation* 2011;121:2750-2767.

13 Lehmann BD, Jovanović B, Chen X, Estrada MV, Johnson KN, Shyr Y, Moses HL, Sanders ME, Pietenpol JA: Refinement of Triple-Negative Breast Cancer Molecular Subtypes: Implications for Neoadjuvant Chemotherapy Selection. *PloS one* 2016;11:e0157368.

14 Prat A, Perou CM: Deconstructing the molecular portraits of breast cancer. *Molecular oncology* 2011;5:5-23.

15 Sorlie T, Perou CM, Tibshirani R, Aas T, Geisler S, Johnsen H, Hastie T, Eisen MB, van de Rijn M, Jeffrey SS, Thorsen T, Quist H, Matese JC, Brown PO, Botstein D, Lonning PE, Borresen-Dale AL: Gene expression patterns of breast carcinomas distinguish tumor subclasses with clinical implications. *Proceedings of the National Academy of Sciences of the United States of America* 2001;98:10869-10874.

16 Parker JS, Mullins M, Cheang MC, Leung S, Voduc D, Vickery T, Davies S, Fauron C, He X, Hu Z, Quackenbush JF, Stijleman IJ, Palazzo J, Marron JS, Nobel AB, Mardis E, Nielsen TO, Ellis MJ, Perou CM, Bernard PS: Supervised risk predictor of breast cancer based on intrinsic subtypes. *Journal of clinical oncology : official journal of the American Society of Clinical Oncology* 2009;27:1160-1167.

17 Fong PC, Boss DS, Yap TA, Tutt A, Wu P, Mergui-Roelvink M, Mortimer P, Swaisland H, Lau A, O'Connor MJ, Ashworth A, Carmichael J, Kaye SB, Schellens JH, de Bono JS: Inhibition of poly(ADP-ribose) polymerase in tumors from BRCA mutation carriers. *The New England journal of medicine* 2009;361:123-134.

18 Kriege M, Seynaeve C, Meijers-Heijboer H, Collee JM, Menke-Pluymers MB, Bartels CC, Tilanus-Linthorst MM, Blom J, Huijskens E, Jager A, van den Ouweland A, van Geel B, Hoening MJ, Brekelmans CT, Klijn JG: Sensitivity to first-line chemotherapy for metastatic breast cancer in BRCA1 and BRCA2 mutation carriers. *Journal of clinical oncology : official journal of the American Society of Clinical Oncology* 2009;27:3764-3771.

19 Kriege M, Jager A, Hoening MJ, Huijskens E, Blom J, van Deurzen CH, Bontenbal M, Collee JM, Menke-Pluymers MB, Martens JW, Seynaeve C: The efficacy of taxane chemotherapy for metastatic breast cancer in BRCA1 and BRCA2 mutation carriers. *Cancer* 2012;118:899-907.

20 Prat A, Parker JS, Karginova O, Fan C, Livasy C, Herschkowitz JI, He X, Perou CM: Phenotypic and molecular characterization of the claudin-low intrinsic subtype of breast cancer. *Breast cancer research : BCR* 2010;12:R68.

- 21 Creighton CJ, Li X, Landis M, Dixon JM, Neumeister VM, Sjolund A, Rimm DL, Wong H, Rodriguez A, Herschkowitz JI, Fan C, Zhang X, He X, Pavlick A, Gutierrez MC, Renshaw L, Larionov AA, Faratian D, Hilsenbeck SG, Perou CM, Lewis MT, Rosen JM, Chang JC: Residual breast cancers after conventional therapy display mesenchymal as well as tumor-initiating features. *Proceedings of the National Academy of Sciences of the United States of America* 2009;106:13820-13825.
- 22 Chen X, Li J, Gray WH, Lehmann BD, Bauer JA, Shyr Y, Pietenpol JA: TNBCtype: A Subtyping Tool for Triple-Negative Breast Cancer. *Cancer informatics* 2012;11:147-156.
- 23 Sikov WM BD, Perou CM, et al. : Impact of the addition of carboplatin (Cb) and/or bevacizumab (B) to neoadjuvant weekly paclitaxel (P) followed by dose-dense AC on pathologic complete response (pCR) rates in triple-negative breast cancer (TNBC): CALGB 40603 (Alliance). *San Antonio Breast Cancer Symposium, December 10–14, 2013* Abstract S5-01 2013.
- 24 Silver DP, Richardson AL, Eklund AC, Wang ZC, Szallasi Z, Li Q, Juul N, Leong CO, Calogrias D, Buraimoh A, Fatima A, Gelman RS, Ryan PD, Tung NM, De Nicolo A, Ganesan S, Miron A, Colin C, Sgroi DC, Ellisen LW, Winer EP, Garber JE: Efficacy of neoadjuvant Cisplatin in triple-negative breast cancer. *Journal of clinical oncology : official journal of the American Society of Clinical Oncology* 2010;28:1145-1153.
- 25 Telli M: Optimizing chemotherapy in triple-negative breast cancer: the role of platinum. *American Society of Clinical Oncology educational book / ASCO American Society of Clinical Oncology Meeting 2014*:e37-42.
- 26 Ring BZ, Hout DR, Morris SW, Lawrence K, Schweitzer BL, Bailey DB, Lehmann BD, Pietenpol JA, Seitz RS: Generation of an algorithm based on minimal gene sets to clinically subtype triple negative breast cancer patients. *BMC Cancer* 2016;16:143.
- 27 Gao J, Aksoy BA, Dogrusoz U, Dresdner G, Gross B, Sumer SO, Sun Y, Jacobsen A, Sinha R, Larsson E, Cerami E, Sander C, Schultz N: Integrative analysis of complex cancer genomics and clinical profiles using the cBioPortal. *Sci Signal* 2013;6:pl1.
- 28 The Cancer Genome Atlas. *Nature* 2012;490:61-70.
- 29 Couch FJ, Hart SN, Sharma P, Toland AE, Wang X, Miron P, Olson JE, Godwin AK, Pankratz VS, Olswold C, Slettedahl S, Hallberg E, Guidugli L, Davila JI, Beckmann MW, Janni W, Rack B, Ekici AB, Slamon DJ, Konstantopoulou I, Fostira F, Vratimos A, Fountzilias G, Pelttari LM, Tapper WJ, Durcan L, Cross SS, Pilarski R, Shapiro CL, Klemp J, Yao S, Garber J, Cox A, Brauch H, Ambrosone C, Nevanlinna H, Yannoukakos D, Slager SL, Vachon CM, Eccles DM, Fasching PA: Inherited Mutations in 17 Breast Cancer Susceptibility Genes Among a Large Triple-Negative Breast Cancer Cohort Unselected for Family History of Breast Cancer. *Journal of Clinical Oncology* 2015;33:304-311.
- 30 Banerji S, Cibulskis K, Rangel-Escareno C, Brown KK, Carter SL, Frederick AM, Lawrence MS, Sivachenko AY, Sougnez C, Zou L, Cortes ML, Fernandez-Lopez JC, Peng S, Ardlie KG, Auclair D, Bautista-Pina V, Duke F, Francis J, Jung J, Maffuz-Aziz A, Onofrio RC, Parkin M, Pho NH, Quintanar-Jurado V, Ramos AH, Rebollar-Vega R, Rodriguez-Cuevas S, Romero-Cordoba SL, Schumacher SE, Stransky N, Thompson KM, Uribe-Figueroa L, Baselga J, Beroukhir R, Polyak K, Sgroi DC, Richardson AL, Jimenez-Sanchez G, Lander ES, Gabriel SB, Garraway LA, Golub TR,

- Melendez-Zajgla J, Toker A, Getz G, Hidalgo-Miranda A, Meyerson M: Sequence analysis of mutations and translocations across breast cancer subtypes. *Nature* 2012;486:405-409.
- 31 Lips EH, Michaut M, Hoogstraat M, Mulder L, Besselink NJ, Koudijs MJ, Cuppen E, Voest EE, Bernards R, Nederlof PM, Wesseling J, Rodenhuis S, Wessels LF: Next generation sequencing of triple negative breast cancer to find predictors for chemotherapy response. *Breast Cancer Research* 2015;17:134.
- 32 Balko JM, Giltnane JM, Wang K, Schwarz LJ, Young CD, Cook RS, Owens P, Sanders ME, Kuba MG, Sánchez V, Kurupi R, Moore PD, Pinto JA, Doimi FD, Gómez H, Horiuchi D, Goga A, Lehmann BD, Bauer JA, Pietenpol JA, Ross JS, Palmer GA, Yelensky R, Cronin M, Miller VA, Stephens PJ, Arteaga CL: Molecular Profiling of the Residual Disease of Triple-Negative Breast Cancers after Neoadjuvant Chemotherapy Identifies Actionable Therapeutic Targets. *Cancer discovery* 2014;4:232.
- 33 Pinto JA, Araujo J, Cardenas NK, Morante Z, Doimi F, Vidaurre T, Balko JM, Gomez HL: A prognostic signature based on three-genes expression in triple-negative breast tumours with residual disease. *Npj Genomic Medicine* 2016;1:15015.
- 34 Dawood S, Broglio K, Gonzalez-Angulo AM, Buzdar AU, Hortobagyi GN, Giordano SH: Trends in survival over the past two decades among white and black patients with newly diagnosed stage IV breast cancer. *Journal of clinical oncology : official journal of the American Society of Clinical Oncology* 2008;26:4891-4898.
- 35 <http://www.nccn.org>.
- 36 Gianni L, Norton L, Wolmark N, Suter TM, Bonadonna G, Hortobagyi GN: Role of anthracyclines in the treatment of early breast cancer. *Journal of clinical oncology : official journal of the American Society of Clinical Oncology* 2009;27:4798-4808.
- 37 Hayes DF, Thor AD, Dressler LG, Weaver D, Edgerton S, Cowan D, Broadwater G, Goldstein LJ, Martino S, Ingle JN, Henderson IC, Norton L, Winer EP, Hudis CA, Ellis MJ, Berry DA, Cancer, Leukemia Group B: HER2 and response to paclitaxel in node-positive breast cancer. *The New England journal of medicine* 2007;357:1496-1506.
- 38 Hugh J, Hanson J, Cheang MC, Nielsen TO, Perou CM, Dumontet C, Reed J, Krajewska M, Treilleux I, Rupin M, Magherini E, Mackey J, Martin M, Vogel C: Breast cancer subtypes and response to docetaxel in node-positive breast cancer: use of an immunohistochemical definition in the BCIRG 001 trial. *Journal of clinical oncology : official journal of the American Society of Clinical Oncology* 2009;27:1168-1176.
- 39 Sparano JA, Wang M, Martino S, Jones V, Perez EA, Saphner T, Wolff AC, Sledge GW, Jr., Wood WC, Davidson NE: Weekly Paclitaxel in the Adjuvant Treatment of Breast Cancer. *The New England journal of medicine* 2008;358:1663-1671.
- 40 Jones S, Holmes FA, O'Shaughnessy J, Blum JL, Vukelja SJ, McIntyre KJ, Pippin JE, Bordelon JH, Kirby RL, Sandbach J, Hyman WJ, Richards DA, Mennel RG, Boehm KA, Meyer WG, Asmar L, Mackey D, Riedel S, Muss H, Savin MA: Docetaxel With Cyclophosphamide Is Associated With an Overall Survival Benefit Compared With Doxorubicin and Cyclophosphamide: 7-Year Follow-Up of US Oncology Research Trial 9735. *Journal of clinical oncology : official journal of the American Society of Clinical Oncology* 2009;27:1177-1183.

- 41 Thomas ES, Gomez HL, Li RK, Chung HC, Fein LE, Chan VF, Jassem J, Pivot XB, Klimovsky JV, de Mendoza FH, Xu B, Campone M, Lerzo GL, Peck RA, Mukhopadhyay P, Vahdat LT, Roche HH: Ixabepilone plus capecitabine for metastatic breast cancer progressing after anthracycline and taxane treatment. *Journal of clinical oncology : official journal of the American Society of Clinical Oncology* 2007;25:5210-5217.
- 42 Twelves C, Cortes J, Vahdat LT, Wanders J, Akerele C, Kaufman PA: Phase III trials of eribulin mesylate (E7389) in extensively pretreated patients with locally recurrent or metastatic breast cancer. *Clinical breast cancer* 2010;10:160-163.
- 43 Cortazar P, Zhang L, Untch M, Mehta K, Costantino JP, Wolmark N, Bonnefoi H, Cameron D, Gianni L, Valagussa P, Swain SM, Prowell T, Loibl S, Wickerham DL, Bogaerts J, Baselga J, Perou C, Blumenthal G, Blohmer J, Mamounas EP, Bergh J, Semiglazov V, Justice R, Eidtmann H, Paik S, Piccart M, Sridhara R, Fasching PA, Slaets L, Tang S, Gerber B, Geyer CE, Jr., Pazdur R, Ditsch N, Rastogi P, Eiermann W, von Minckwitz G: Pathological complete response and long-term clinical benefit in breast cancer: the CTNeoBC pooled analysis. *Lancet* 2014.
- 44 Gonzalez-Angulo AM, Timms KM, Liu S, Chen H, Litton JK, Potter J, Lanchbury JS, Stemke-Hale K, Hennessy BT, Arun BK, Hortobagyi GN, Do KA, Mills GB, Meric-Bernstam F: Incidence and outcome of BRCA mutations in unselected patients with triple receptor-negative breast cancer. *Clinical cancer research : an official journal of the American Association for Cancer Research* 2011;17:1082-1089.
- 45 Hurley J, Reis IM, Rodgers SE, Gomez-Fernandez C, Wright J, Leone JP, Larrieu R, Pegram MD: The use of neoadjuvant platinum-based chemotherapy in locally advanced breast cancer that is triple negative: retrospective analysis of 144 patients. *Breast Cancer Res Treat* 2013;138:783-794.
- 46 Gronwald J BT, Huzarski T et al.: Neoadjuvant therapy with cisplatin in BRCA1-positive breast cancer patients. *J Clin Oncol (Meeting Abstracts)* 2009;27.
- 47 von Minckwitz G, Schneeweiss A, Loibl S, Salat C, Denkert C, Rezai M, Blohmer JU, Jackisch C, Paepke S, Gerber B, Zahm DM, Kummel S, Eidtmann H, Klare P, Huober J, Costa S, Tesch H, Hanusch C, Hilfrich J, Khandan F, Fasching PA, Sinn BV, Engels K, Mehta K, Nekljudova V, Untch M: Neoadjuvant carboplatin in patients with triple-negative and HER2-positive early breast cancer (GeparSixto; GBG 66): a randomised phase 2 trial. *The Lancet Oncology* 2014;15:747-756.
- 48 von Minckwitz G, Loibl S, Schneeweiss A: Early survival analysis of the randomized phase II trial investigating the addition of carboplatin to neoadjuvant therapy for triple-negative and HER2-positive early breast cancer (GeparSixto). . *San Antonio Breast Cancer Symposium* 2015;Abstract S2-04. .
- 49 Sikov WM, Berry DA, Perou CM: Event-free and overall survival following neoadjuvant weekly paclitaxel and dose-dense AC +/- carboplatin and/or bevacizumab in triple-negative breast cancer: Outcomes from CALGB 40603 (Alliance). . *San Antonio Breast Cancer Symposium* 2015;Abstract S2-05.

- 50 Bardia A DR, Mayer A, et al.: Safety and efficacy of anti-Trop-2 antibody drug conjugate, sacituzumab govitecan (IMMU-132), in heavily pretreated patients with TNBC; 2015 San Antonio Breast Cancer Symposium. San Antonio, TX, 2015.
- 51 Balko JM, Cook RS, Vaught DB, Kuba MG, Miller TW, Bhola NE, Sanders ME, Granja-Ingram NM, Smith JJ, Meszoely IM, Salter J, Dowsett M, Stemke-Hale K, Gonzalez-Angulo AM, Mills GB, Pinto JA, Gomez HL, Arteaga CL: Profiling of residual breast cancers after neoadjuvant chemotherapy identifies DUSP4 deficiency as a mechanism of drug resistance. *Nature medicine* 2012;18:1052-1059.
- 52 Yoshida T, Ozawa Y, Kimura T, Sato Y, Kuznetsov G, Xu S, Uesugi M, Agoulnik S, Taylor N, Funahashi Y, Matsui J: Eribulin mesilate suppresses experimental metastasis of breast cancer cells by reversing phenotype from epithelial-mesenchymal transition (EMT) to mesenchymal-epithelial transition (MET) states. *British journal of cancer* 2014;110:1497-1505.
- 53 Hu J, Horwitz SB, McDaid HM: The antitumor efficacy of eribulin is mediated via suppression of invasion and profound induction of cell death in triple negative breast cancer. *Mol Cancer Ther* 2013;12.
- 54 Hanahan D, Weinberg RA: The Hallmarks of Cancer. *Cell* 2000;100:57-70.
- 55 Prowell TM, Pazdur R: Pathological complete response and accelerated drug approval in early breast cancer. *The New England journal of medicine* 2012;366:2438-2441.
- 56 von Minckwitz G, Eidtmann H, Rezai M, Fasching PA, Tesch H, Eggemann H, Schrader I, Kittel K, Hanusch C, Kreienberg R, Solbach C, Gerber B, Jackisch C, Kunz G, Blohmer JU, Huober J, Hauschild M, Fehm T, Muller BM, Denkert C, Loibl S, Nekljudova V, Untch M, German Breast G, Arbeitsgemeinschaft Gynakologische Onkologie-Breast Study G: Neoadjuvant chemotherapy and bevacizumab for HER2-negative breast cancer. *The New England journal of medicine* 2012;366:299-309.
- 57 Buchholz TA, Hill BS, Tucker SL, Frye DK, Kuerer HM, Buzdar AU, McNeese MD, Singletary SE, Ueno NT, Pusztai L, Valero V, Hortobagyi GN: Factors predictive of outcome in patients with breast cancer refractory to neoadjuvant chemotherapy. *Cancer journal* 2001;7:413-420.
- 58 Symmans WF, Peintinger F, Hatzis C, Rajan R, Kuerer H, Valero V, Assad L, Poniacka A, Hennessy B, Green M, Buzdar AU, Singletary SE, Hortobagyi GN, Pusztai L: Measurement of residual breast cancer burden to predict survival after neoadjuvant chemotherapy. *Journal of clinical oncology : official journal of the American Society of Clinical Oncology* 2007;25:4414-4422.
- 59 Lee S-J, Toi M: A phase III trial of adjuvant capecitabine in breast cancer patients with HER2-negative pathologic residual invasive disease after neoadjuvant chemotherapy (CREATE-X/JBCRG-04). Presented at: San Antonio Breast Cancer Symposium; December 8-12, 2015; San Antonio, TX:Abstract: S1-07.
- 60 Dwadasi S, Tong Y, Walsh T, Danso MA, Ma CX, Silverman P, King MC, Perkins SM, Badve SS, Miller K: Cisplatin with or without rucaparib after preoperative chemotherapy in patients with triple-negative breast cancer (TNBC): Hoosier Oncology Group BRE09-146. *Journal of*



clinical oncology : official journal of the American Society of Clinical Oncology 2014;32:5s, (suppl; abstr 1019).

61 Livasy CA, Karaca G, Nanda R, Tretiakova MS, Olopade OI, Moore DT, Perou CM: Phenotypic evaluation of the basal-like subtype of invasive breast carcinoma. *Modern pathology : an official journal of the United States and Canadian Academy of Pathology, Inc* 2006;19:264-271.

62 Carey LA, Rugo HS, Marcom PK, Mayer EL, Esteva FJ, Ma CX, Liu MC, Storniolo AM, Rimawi MF, Forero-Torres A, Wolff AC, Hobday TJ, Ivanova A, Chiu WK, Ferraro M, Burrows E, Bernard PS, Hoadley KA, Perou CM, Winer EP: TBCRC 001: randomized phase II study of cetuximab in combination with carboplatin in stage IV triple-negative breast cancer. *Journal of clinical oncology : official journal of the American Society of Clinical Oncology* 2012;30:2615-2623.

63 O'Shaughnessy J, Osborne C, Pippen JE, Yoffe M, Patt D, Rocha C, Koo IC, Sherman BM, Bradley C: Iniparib plus chemotherapy in metastatic triple-negative breast cancer. *The New England journal of medicine* 2011;364:205-214.

64 O'Shaughnessy J SL, Danso MA: A randomized phase III study of iniparib (BSI-201) in combination with gemcitabine/carboplatin (G/C) in metastatic triple-negative breast cancer (TNBC). *Journal of clinical oncology : official journal of the American Society of Clinical Oncology* 2011;29.

65 Baselga J, Gomez P, Greil R, Braga S, Climent MA, Wardley AM, Kaufman B, Stemmer SM, Pego A, Chan A, Goeminne JC, Graas MP, Kennedy MJ, Ciruelos Gil EM, Schneeweiss A, Zubel A, Groos J, Melezinkova H, Awada A: Randomized phase II study of the anti-epidermal growth factor receptor monoclonal antibody cetuximab with cisplatin versus cisplatin alone in patients with metastatic triple-negative breast cancer. *Journal of clinical oncology : official journal of the American Society of Clinical Oncology* 2013;31:2586-2592.

66 Dickler MN, Cobleigh MA, Miller KD, Klein PM, Winer EP: Efficacy and safety of erlotinib in patients with locally advanced or metastatic breast cancer. *Breast Cancer Res Treat* 2009;115:115-121.

67 Gutteridge E, Agrawal A, Nicholson R, Leung Cheung K, Robertson J, Gee J: The effects of gefitinib in tamoxifen-resistant and hormone-insensitive breast cancer: a phase II study. *International journal of cancer Journal international du cancer* 2010;126:1806-1816.

68 Burstein HJ, Elias AD, Rugo HS, Cobleigh MA, Wolff AC, Eisenberg PD, Lehman M, Adams BJ, Bello CL, DePrimo SE, Baum CM, Miller KD: Phase II Study of Sunitinib Malate, an Oral Multitargeted Tyrosine Kinase Inhibitor, in Patients With Metastatic Breast Cancer Previously Treated With an Anthracycline and a Taxane. *Journal of clinical oncology : official journal of the American Society of Clinical Oncology* 2008;26:1810-1816.

69 Crown JP, Dieras V, Staroslawska E, Yardley DA, Bachelot T, Davidson N, Wildiers H, Fasching PA, Capitain O, Ramos M, Greil R, Cognetti F, Fountzilas G, Blasinska-Morawiec M, Liedtke C, Kreienberg R, Miller WH, Jr., Tassell V, Huang X, Paolini J, Kern KA, Romieu G: Phase III trial of sunitinib in combination with capecitabine versus capecitabine monotherapy for the

treatment of patients with pretreated metastatic breast cancer. *Journal of clinical oncology : official journal of the American Society of Clinical Oncology* 2013;31:2870-2878.

70 Bear HD, Tang G, Rastogi P, Geyer CE, Jr., Robidoux A, Atkins JN, Baez-Diaz L, Brufsky AM, Mehta RS, Fehrenbacher L, Young JA, Senecal FM, Gaur R, Margolese RG, Adams PT, Gross HM, Costantino JP, Swain SM, Mamounas EP, Wolmark N: Bevacizumab added to neoadjuvant chemotherapy for breast cancer. *The New England journal of medicine* 2012;366:310-320.

71 Cameron D, Brown J, Dent R, Jackisch C, Mackey J, Pivot X, Steger GG, Suter TM, Toi M, Parmar M, Laeufle R, Im YH, Romieu G, Harvey V, Lipatov O, Pienkowski T, Cottu P, Chan A, Im SA, Hall PS, Bubuteishvili-Pacaud L, Henschel V, Deurloo RJ, Pallaud C, Bell R: Adjuvant bevacizumab-containing therapy in triple-negative breast cancer (BEATRICE): primary results of a randomised, phase 3 trial. *The Lancet Oncology* 2013;14:933-942.

72 Ame JC, Spenlehauer C, de Murcia G: The PARP superfamily. *BioEssays : news and reviews in molecular, cellular and developmental biology* 2004;26:882-893.

73 Bryant HE, Schultz N, Thomas HD, Parker KM, Flower D, Lopez E, Kyle S, Meuth M, Curtin NJ, Helleday T: Specific killing of BRCA2-deficient tumours with inhibitors of poly(ADP-ribose) polymerase. *Nature* 2005;434:913-917.

74 Farmer H, McCabe N, Lord CJ, Tutt AN, Johnson DA, Richardson TB, Santarosa M, Dillon KJ, Hickson I, Knights C, Martin NM, Jackson SP, Smith GC, Ashworth A: Targeting the DNA repair defect in BRCA mutant cells as a therapeutic strategy. *Nature* 2005;434:917-921.

75 Ratnam K, Low JA: Current development of clinical inhibitors of poly(ADP-ribose) polymerase in oncology. *Clinical cancer research : an official journal of the American Association for Cancer Research* 2007;13:1383-1388.

76 Liu X, Shi Y, Maag DX, Palma JP, Patterson MJ, Ellis PA, Surber BW, Ready DB, Soni NB, Lador US, Xu AJ, Iyer R, Harlan JE, Solomon LR, Donawho CK, Penning TD, Johnson EF, Shoemaker AR: Iniparib nonselectively modifies cysteine-containing proteins in tumor cells and is not a bona fide PARP inhibitor. *Clinical cancer research : an official journal of the American Association for Cancer Research* 2012;18:510-523.

77 Patel AG, De Lorenzo SB, Flatten KS, Poirier GG, Kaufmann SH: Failure of iniparib to inhibit poly(ADP-Ribose) polymerase in vitro. *Clinical cancer research : an official journal of the American Association for Cancer Research* 2012;18:1655-1662.

78 Tutt A, Robson M, Garber JE, Domchek SM, Audeh MW, Weitzel JN, Friedlander M, Arun B, Loman N, Schmutzler RK, Wardley A, Mitchell G, Earl H, Wickens M, Carmichael J: Oral poly(ADP-ribose) polymerase inhibitor olaparib in patients with BRCA1 or BRCA2 mutations and advanced breast cancer: a proof-of-concept trial. *Lancet* 2010;376:235-244.

79 Gelmon KA, Tischkowitz M, Mackay H, Swenerton K, Robidoux A, Tonkin K, Hirte H, Huntsman D, Clemons M, Gilks B, Yerushalmi R, Macpherson E, Carmichael J, Oza A: Olaparib in patients with recurrent high-grade serous or poorly differentiated ovarian carcinoma or triple-negative breast cancer: a phase 2, multicentre, open-label, non-randomised study. *The Lancet Oncology* 2011;12:852-861.



- 80 Isakoff SJ OB, Tung NM, Gelman RM, et al: A phase II trial of the PARP inhibitor veliparib (ABT888) and temozolomide for metastatic breast cancer. *Journal of clinical oncology : official journal of the American Society of Clinical Oncology* 2010;28:15s.
- 81 Rugo HS OO, DeMichele A, et al.: Veliparib/carboplatin plus standard neoadjuvant therapy for high-risk breast cancer: First efficacy results from the I-SPY 2 TRIAL. Presented at: the 36th Annual San Antonio Breast Cancer Symposium held December 10-14, 2013, San Antonio, TX Abstract S5-02 2013.
- 82 Doane AS, Danso M, Lal P, Donaton M, Zhang L, Hudis C, Gerald WL: An estrogen receptor-negative breast cancer subset characterized by a hormonally regulated transcriptional program and response to androgen. *Oncogene* 2006;25:3994-4008.
- 83 Gucalp A, Tolaney S, Isakoff SJ, Ingle JN, Liu MC, Carey LA, Blackwell K, Rugo H, Nabell L, Forero A, Stearns V, Doane AS, Danso M, Moynahan ME, Momen LF, Gonzalez JM, Akhtar A, Giri DD, Patil S, Feigin KN, Hudis CA, Traina TA, Translational Breast Cancer Research C: Phase II trial of bicalutamide in patients with androgen receptor-positive, estrogen receptor-negative metastatic Breast Cancer. *Clinical cancer research : an official journal of the American Association for Cancer Research* 2013;19:5505-5512.
- 84 Keen JC, Yan L, Mack KM, Pettit C, Smith D, Sharma D, Davidson NE: A novel histone deacetylase inhibitor, scriptaid, enhances expression of functional estrogen receptor alpha (ER) in ER negative human breast cancer cells in combination with 5-aza 2'-deoxycytidine. *Breast Cancer Res Treat* 2003;81:177-186.
- 85 Tate CR, Rhodes LV, Segar HC, Driver JL, Pounder FN, Burow ME, Collins-Burow BM: Targeting triple-negative breast cancer cells with the histone deacetylase inhibitor panobinostat. *Breast cancer research : BCR* 2012;14:R79.
- 86 Connolly R M SJS, Zorzi, J et al: A multi-institutional double-blind phase II study evaluating response and surrogate biomarkers to carboplatin and nab-paclitaxel (CP) with or without vorinostat as preoperative systemic therapy (PST) in HER2-negative primary operable breast cancer (TBCRC008). *Journal of clinical oncology : official journal of the American Society of Clinical Oncology* 2010;28:15s.
- 87 Cancer Genome Atlas N: Comprehensive molecular portraits of human breast tumours. *Nature* 2012;490:61-70.
- 88 Marty B, Maire V, Gravier E, Rigail G, Vincent-Salomon A, Kappler M, Lebigot I, Djelti F, Tourdes A, Gestraud P, Hupe P, Barillot E, Cruzalegui F, Tucker GC, Stern MH, Thierry JP, Hickman JA, Dubois T: Frequent PTEN genomic alterations and activated phosphatidylinositol 3-kinase pathway in basal-like breast cancer cells. *Breast cancer research : BCR* 2008;10:R101.
- 89 Yunokawa M, Koizumi F, Kitamura Y, Katanasaka Y, Okamoto N, Kodaira M, Yonemori K, Shimizu C, Ando M, Masutomi K, Yoshida T, Fujiwara Y, Tamura K: Efficacy of everolimus, a novel mTOR inhibitor, against basal-like triple-negative breast cancer cells. *Cancer science* 2012;103:1665-1671.
- 90 Juvekar A, Burga LN, Hu H, Lunsford EP, Ibrahim YH, Balmana J, Rajendran A, Papa A, Spencer K, Lyssiotis CA, Nardella C, Pandolfi PP, Baselga J, Scully R, Asara JM, Cantley LC, Wulf

GM: Combining a PI3K inhibitor with a PARP inhibitor provides an effective therapy for BRCA1-related breast cancer. *Cancer discovery* 2012;2:1048-1063.

91 Ibrahim YH, Garcia-Garcia C, Serra V, He L, Torres-Lockhart K, Prat A, Anton P, Cozar P, Guzman M, Grueso J, Rodriguez O, Calvo MT, Aura C, Diez O, Rubio IT, Perez J, Rodon J, Cortes J, Ellisen LW, Scaltriti M, Baselga J: PI3K inhibition impairs BRCA1/2 expression and sensitizes BRCA-proficient triple-negative breast cancer to PARP inhibition. *Cancer discovery* 2012;2:1036-1047.

92 Vora Sadhna R, Juric D, Kim N, Mino-Kenudson M, Huynh T, Costa C, Lockerman Elizabeth L, Pollack Sarah F, Liu M, Li X, Lehar J, Wiesmann M, Wartmann M, Chen Y, Cao ZA, Pinzon-Ortiz M, Kim S, Schlegel R, Huang A, Engelman Jeffrey A: CDK 4/6 Inhibitors Sensitize *PIK3CA* Mutant Breast Cancer to PI3K Inhibitors. *Cancer Cell*;26:136-149.

93 Gonzalez-Angulo AM, Akcakanat A, Liu S, Green MC, Murray JL, Chen H, Palla SL, Koenig KB, Brewster AM, Valero V, Ibrahim NK, Moulder-Thompson S, Litton JK, Tarco E, Moore J, Flores P, Crawford D, Dryden MJ, Symmans WF, Sahin A, Giordano SH, Puztai L, Do KA, Mills GB, Hortobagyi GN, Meric-Bernstam F: Open-label randomized clinical trial of standard neoadjuvant chemotherapy with paclitaxel followed by FEC versus the combination of paclitaxel and everolimus followed by FEC in women with triple receptor-negative breast cancer. *Annals of oncology : official journal of the European Society for Medical Oncology / ESMO* 2014;25:1122-1127.

94 Singh JC VM, Novik Y, et al.: RAD001-carboplatin combination in triple-negative metastatic breast cancer (TNMBC): A phase II trial. *Journal of clinical oncology : official journal of the American Society of Clinical Oncology* 2013;31.

95 Hoeflich KP, O'Brien C, Boyd Z, Cavet G, Guerrero S, Jung K, Januario T, Savage H, Punnoose E, Truong T, Zhou W, Berry L, Murray L, Amler L, Belvin M, Friedman LS, Lackner MR: In vivo antitumor activity of MEK and phosphatidylinositol 3-kinase inhibitors in basal-like breast cancer models. *Clinical cancer research : an official journal of the American Association for Cancer Research* 2009;15:4649-4664.

96 Duncan JS, Whittle MC, Nakamura K, Abell AN, Midland AA, Zawistowski JS, Johnson NL, Granger DA, Jordan NV, Darr DB, Usary J, Kuan PF, Smalley DM, Major B, He X, Hoadley KA, Zhou B, Sharpless NE, Perou CM, Kim WY, Gomez SM, Chen X, Jin J, Frye SV, Earp HS, Graves LM, Johnson GL: Dynamic reprogramming of the kinome in response to targeted MEK inhibition in triple-negative breast cancer. *Cell* 2012;149:307-321.

97 Johnson LG AK, Duncan JS, Whittle M, Zawistowski J, Goulet D, He X, Noe J, Perou CM, Earp S, Carey LA: Kinome reprogramming response to MEK inhibition: A window-of-opportunity trial in triple-negative breast cancer (TNBC). *Journal of clinical oncology : official journal of the American Society of Clinical Oncology* 2013;31.

98 Mirzoeva OK, Das D, Heiser LM, Bhattacharya S, Siwak D, Gendelman R, Bayani N, Wang NJ, Neve RM, Guan Y, Hu Z, Knight Z, Feiler HS, Gascard P, Parvin B, Spellman PT, Shokat KM, Wyrobek AJ, Bissell MJ, McCormick F, Kuo WL, Mills GB, Gray JW, Korn WM: Basal subtype and MAPK/ERK kinase (MEK)-phosphoinositide 3-kinase feedback signaling determine susceptibility of breast cancer cells to MEK inhibition. *Cancer research* 2009;69:565-572.

- 99 Roberts PJ, Usary JE, Darr DB, Dillon PM, Pfefferle AD, Whittle MC, Duncan JS, Johnson SM, Combest AJ, Jin J, Zamboni WC, Johnson GL, Perou CM, Sharpless NE: Combined PI3K/mTOR and MEK inhibition provides broad antitumor activity in faithful murine cancer models. *Clinical cancer research : an official journal of the American Association for Cancer Research* 2012;18:5290-5303.
- 100 Engelman JA, Chen L, Tan X, Crosby K, Guimaraes AR, Upadhyay R, Maira M, McNamara K, Perera SA, Song Y, Chirieac LR, Kaur R, Lightbown A, Simendinger J, Li T, Padera RF, Garcia-Echeverria C, Weissleder R, Mahmood U, Cantley LC, Wong KK: Effective use of PI3K and MEK inhibitors to treat mutant Kras G12D and PIK3CA H1047R murine lung cancers. *Nature medicine* 2008;14:1351-1356.
- 101 Legrier ME, Yang CP, Yan HG, Lopez-Barcons L, Keller SM, Perez-Soler R, Horwitz SB, McDaid HM: Targeting protein translation in human non small cell lung cancer via combined MEK and mammalian target of rapamycin suppression. *Cancer research* 2007;67:11300-11308.
- 102 Schweber S, Rodriguez-LaRocca A, Calvert V, Petricoin E, Horwitz S, Andreopoulou E, McDaid HM: Protein pathway activation mapping guided biomarker development to identify optimal combinations of MEK inhibitor with PI3K/mTOR pathway inhibitors for the treatment of triple-negative breast cancer. *Journal of clinical oncology : official journal of the American Society of Clinical Oncology* 2013;31.
- 103 Chen MS, Ryan CE, Piwnica-Worms H: Chk1 kinase negatively regulates mitotic function of Cdc25A phosphatase through 14-3-3 binding. *Molecular and cellular biology* 2003;23:7488-7497.
- 104 Ma CX, Cai S, Li S, Ryan CE, Guo Z, Schaiff WT, Lin L, Hoog J, Goiffon RJ, Prat A, Aft RL, Ellis MJ, Piwnica-Worms H: Targeting Chk1 in p53-deficient triple-negative breast cancer is therapeutically beneficial in human-in-mouse tumor models. *The Journal of clinical investigation* 2012;122:1541-1552.
- 105 Ruffell B, Au A, Rugo HS, Esserman LJ, Hwang ES, Coussens LM: Leukocyte composition of human breast cancer. *Proceedings of the National Academy of Sciences* 2012;109:2796-2801.
- 106 Loi S, Sirtaine N, Piette F, Salgado R, Viale G, Van Eenoo F, Rouas G, Francis P, Crown JP, Hitre E, de Azambuja E, Quinaux E, Di Leo A, Michiels S, Piccart MJ, Sotiriou C: Prognostic and predictive value of tumor-infiltrating lymphocytes in a phase III randomized adjuvant breast cancer trial in node-positive breast cancer comparing the addition of docetaxel to doxorubicin with doxorubicin-based chemotherapy: BIG 02-98. *Journal of clinical oncology : official journal of the American Society of Clinical Oncology* 2013;31:860-867.
- 107 Adams S, Gray RJ, Demaria S, Goldstein L, Perez EA, Shulman LN, Martino S, Wang M, Jones VE, Saphner TJ, Wolff AC, Wood WC, Davidson NE, Sledge GW, Sparano JA, Badve SS: Prognostic Value of Tumor-Infiltrating Lymphocytes in Triple-Negative Breast Cancers From Two Phase III Randomized Adjuvant Breast Cancer Trials: ECOG 2197 and ECOG 1199. *Journal of clinical oncology : official journal of the American Society of Clinical Oncology* 2014.
- 108 Denkert C, LS, Salat C, et al: Increased tumor-associated lymphocytes predicts benefit from addition of carboplatin to neoadjuvant therapy for triple-negative and HER2-positive early

breast cancer in the GeparSixto trial (GBG 66/AGO-B). 2013 San Antonio Breast Cancer Symposium Abstract S1-06 Presented December 11 2013.

109 Vinayak S GR, Adams S, Jensen KC, Manola J, Afghahi A, Goldstein LJ, Ford JM, Badve SS, Telli ML: Association of increased tumor-infiltrating lymphocytes (TILs) with immunomodulatory (IM) triple-negative breast cancer (TNBC) subtype and response to neoadjuvant platinum-based therapy in PrECOG0105. *Journal of clinical oncology : official journal of the American Society of Clinical Oncology* 2014;(suppl; abstr 1000^).

110 Ladoire S, Mignot G, Dabakuyo S, Arnould L, Apetoh L, Rébé C, Coudert B, Martin F, Bizollon MH, Vanoli A, Coutant C, Fumoleau P, Bonnetain F, Ghiringhelli F: In situ immune response after neoadjuvant chemotherapy for breast cancer predicts survival. *The Journal of Pathology* 2011;224:389-400.

111 Dieci MV, Criscitiello C, Goubar A, Viale G, Conte P, Guarneri V, Ficarra G, Mathieu MC, Delaloge S, Curigliano G, Andre F: Prognostic value of tumor-infiltrating lymphocytes on residual disease after primary chemotherapy for triple-negative breast cancer: a retrospective multicenter study. *Annals of Oncology* 2014.

112 Stagg J, Allard B: Immunotherapeutic approaches in triple-negative breast cancer: latest research and clinical prospects. *Therapeutic advances in medical oncology* 2013;5:169-181.

113 Topalian SL, Hodi FS, Brahmer JR, Gettinger SN, Smith DC, McDermott DF, Powderly JD, Carvajal RD, Sosman JA, Atkins MB, Leming PD, Spigel DR, Antonia SJ, Horn L, Drake CG, Pardoll DM, Chen L, Sharfman WH, Anders RA, Taube JM, McMiller TL, Xu H, Korman AJ, Jure-Kunkel M, Agrawal S, McDonald D, Kollia GD, Gupta A, Wigginton JM, Sznol M: Safety, activity, and immune correlates of anti-PD-1 antibody in cancer. *The New England journal of medicine* 2012;366:2443-2454.

114 Mittendorf EA, Philips AV, Meric-Bernstam F, Qiao N, Wu Y, Harrington S, Su X, Wang Y, Gonzalez-Angulo AM, Akcakanat A, Chawla A, Curran M, Hwu P, Sharma P, Litton JK, Molldrem JJ, Alatrash G: PD-L1 Expression in Triple Negative Breast Cancer. *Cancer immunology research* 2014;2:361-370.

115 Ali HR, Glont S-E, Blows FM, Provenzano E, Dawson S-J, Liu B, Hiller L, Dunn J, Poole CJ, Bowden S, Earl HM, Pharoah PDP, Caldas C: PD-L1 protein expression in breast cancer is rare, enriched in basal-like tumours and associated with infiltrating lymphocytes. *Annals of Oncology* 2015;26:1488-1493.

116 Ghebeh H, Mohammed S, Al-Omair A, Qattan A, Lehe C, Al-Qudaihi G, Elkum N, Alshabanah M, Amer SB, Tulbah A, Ajarim D, Al-Tweigeri T, Dermime S: The B7-H1 (PD-L1)T Lymphocyte-Inhibitory Molecule Is Expressed in Breast Cancer Patients with Infiltrating Ductal Carcinoma: Correlation with Important High-Risk Prognostic Factors. *Neoplasia (New York, NY)* 2006;8:190-198.

117 Saal LH, Holm K, Maurer M, Memeo L, Su T, Wang X, Yu JS, Malmström P-O, Mansukhani M, Enoksson J, Hibshoosh H, Borg Å, Parsons R: PIK3CA Mutations Correlate with Hormone Receptors, Node Metastasis, and ERBB2, and Are Mutually Exclusive with PTEN Loss in Human Breast Carcinoma. *Cancer research* 2005;65:2554.

- 118 Soliman H, Khalil F, Antonia S: PD-L1 expression is increased in a subset of basal type breast cancer cells. *PloS one* 2014;9:e88557.
- 119 Basu GD GA, Gatalica Z et al: Expression of novel immunotherapeutic targets in triple-negative breast cancer. *Journal of clinical oncology : official journal of the American Society of Clinical Oncology* 2014;32:5s.
- 120 Nanda R, Chow L, Dees EC, Berger R, Gupta S, Geva R, Puztai L, Pathiraja K, Aktan G, Cheng JD, Karantza V, Buisseret L: Pembrolizumab in Patients With Advanced Triple-Negative Breast Cancer: Phase Ib KEYNOTE-012 Study. *Journal of Clinical Oncology* 2016;34:2460-2467.
- 121 Pivot XB, Li RK, Thomas ES, Chung H-C, Fein LE, Chan VF, Jassem J, Mendoza FHd, Mukhopadhyay P, Roché HH: Activity of ixabepilone in oestrogen receptor-negative and oestrogen receptor-progesterone receptor-human epidermal growth factor receptor 2-negative metastatic breast cancer. *European Journal of Cancer*;45:2940-2946.
- 122 Emens LA BF, Cassier P et al: Abstract 2859: Inhibition of PD-L1 by MPDL3280A leads to clinical activity in patients with metastatic triple negative breast cancer (TNBC). *Cancer research* 2015;75:2589.
- 123 Ehlers G, Fridman M: Abscopal effect of radiation in papillary adenocarcinoma. *The British Journal of Radiology* 1973;46:220-222.
- 124 Demaria S, Golden EB, Formenti SC: Role of local radiation therapy in cancer immunotherapy. *JAMA Oncology* 2015;1:1325-1332.
